# Supplementary material
Source: PubMed Central journal article supplement (PMC4286153)
Supplement: pr500756u_si_002.pdf [file pr500756u_si_002.pdf]

**Table S1:** Summary of fatty acids changes due to induced genotype detected following analysis by GC-FID, comparing gastrocnemius muscle, blood serum, and liver tissue from the controls and DTG mice. A reduction of C22:6 (all-cis-4,7,10,13,16,19) was consistently detected in gastrocnemius muscle of the DTG mice, across the effects of diet and ageing. The *P*-values were obtained from t-test comparing HF/HS-fed controls and DTG mice (\* *P*<0.05, \*\* *P*<0.01, \*\*\* *P*<0.001). Stearic acid, C18:0 was found significantly increased in the DTG mice following a two-way ANOVA test (<sup>#</sup> *P*<0.05), showing the increase was consistent across the effect of diet. The *R*<sup>2</sup> and *Q*<sup>2</sup> values of the corresponding PLS-DA model were detailed along the differential metabolites for that model.

| <b>Samples</b>                                                                               | <b>Increased in DTG mice</b>                                                                                                                                                                  | <b>Decreased in DTG mice</b>                                                                                                                                                       |
|----------------------------------------------------------------------------------------------|-----------------------------------------------------------------------------------------------------------------------------------------------------------------------------------------------|------------------------------------------------------------------------------------------------------------------------------------------------------------------------------------|
| <b>Gastrocnemius Muscle</b><br><br>PLS-DA:<br>$R^2X = 52\%$<br>$R^2Y = 68\%$<br>$Q^2 = 57\%$ | <b>SFA</b><br>C18:0*<br><br><b>n-6 PUFA</b><br>C20:4 (all-cis-5,8,11,14)*                                                                                                                     | <b>SFA</b><br>C14:0*<br>C15:0*<br>C16:0*<br>C24:0**<br><br><b>MUFA</b><br>C16:1 (cis-9)*<br><br><b>n-3 PUFA</b><br>C18:3 (all-cis-9,12,15)*<br>C22:6 (all-cis-4,7,10,13,16,19) *** |
| <b>Blood serum</b><br><br>PLS-DA:<br>$R^2X = 49\%$<br>$R^2Y = 60\%$<br>$Q^2 = 46\%$          | <b>SFA</b><br>C14:0*<br>C16:0*<br>C18:0 <sup>#</sup><br><br><b>MUFA</b><br>C18:1 (cis-9)*<br><br><b>n-3 PUFA</b><br>C18:3 (all-cis-9,12,15)*<br><br><b>n-6 PUFA</b><br>C20:2 (all-cis-11,14)* | <b>n-3 PUFA</b><br>C20:3 (all-cis-11,14,17)*                                                                                                                                       |
| <b>Liver tissue</b><br><br>PLS-DA:<br>$R^2X = 78\%$<br>$R^2Y = 83\%$<br>$Q^2 = 48\%$         | <b>SFA</b><br>C18:0 <sup>#</sup><br><br><b>MUFA</b><br>C24:1(cis-15)*                                                                                                                         | <b>MUFA</b><br>C20:1 (cis-11)*<br><br><b>n-6 PUFA</b><br>C20:3 (all-cis-8,11,14)*                                                                                                  |
